# Supplementary material
Source: Royal Society of Chemistry journal article supplement (doi:10.1039/d6eb00057f)
Supplement: d6eb00057f1.pdf [file d6eb00057f1.pdf]

## Supporting Information

### **Weakly-Dissociated Lithium Salt Decouples Solvent-Anion Interfacial Dynamics for Wide-Temperature Lithium-Ion Batteries**

*Shaoyun Zhou†, Zetai Xu†, Chaonan Wang†, Chao Tang, Junhua Jian, Meirong Wang, Hong-Bin Yao, Hongchang Jin\*, Yuhao Lu\*, Hengxing Ji\**

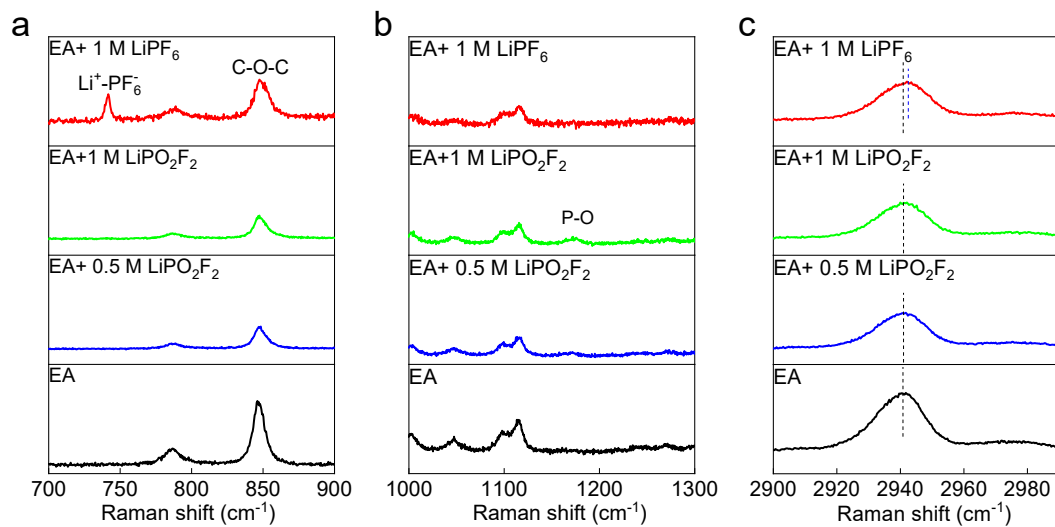

**Figure S1.** (a) Raman shifts from 700 to 900 cm<sup>-1</sup> of EA and different solutions with LiPF<sub>6</sub> or LiDFP as salt respectively. (b) Raman shift from 1000 to 1300 cm<sup>-1</sup>. (c) Raman shift from 2900 to 2990 cm<sup>-1</sup>.

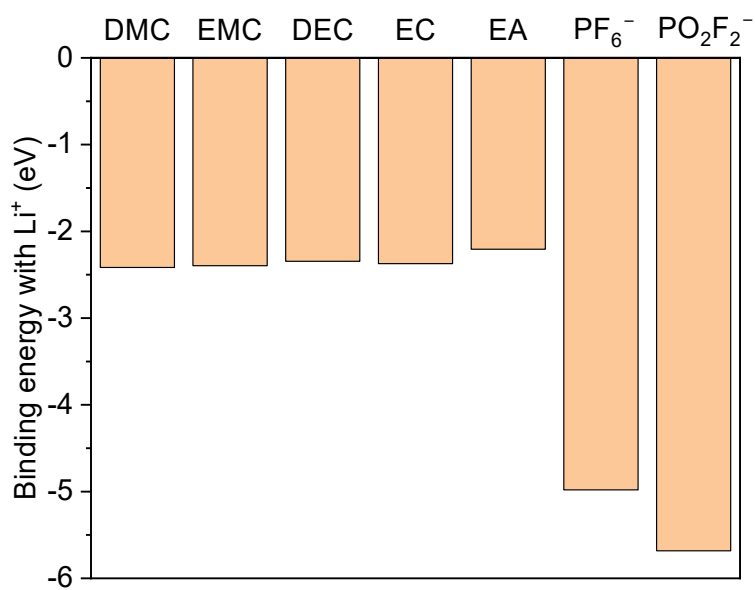

**Figure S2.** Binding energies of Li with different solvents, PF<sub>6</sub><sup>-</sup> and PO<sub>2</sub>F<sub>2</sub><sup>-</sup>.

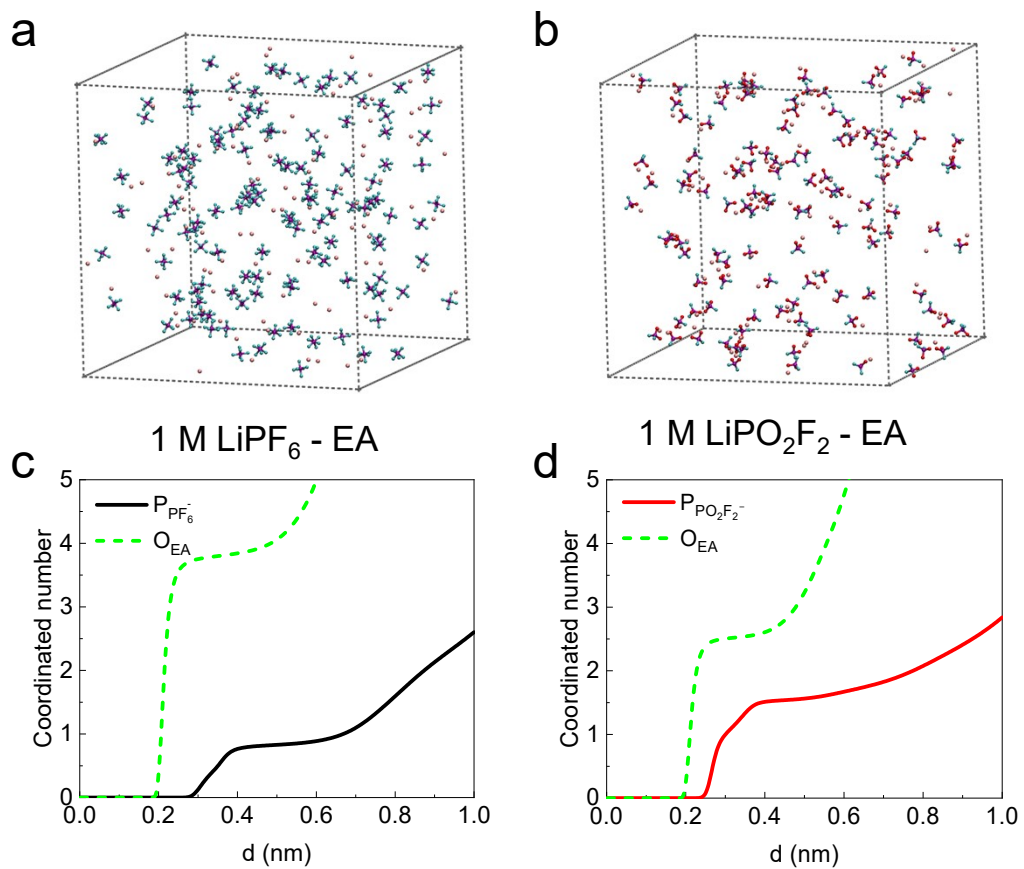

**Figure S3.** Snapshots of solvation structure obtained by MD simulation of 1 M  $\text{LiPF}_6$  EA (a), 1 M  $\text{LiDFP}$  - EA (b).  $\text{Li}^+$  coordination number in 1 M  $\text{LiPF}_6$  EA (c), 1 M  $\text{LiDFP}$  EA (d).

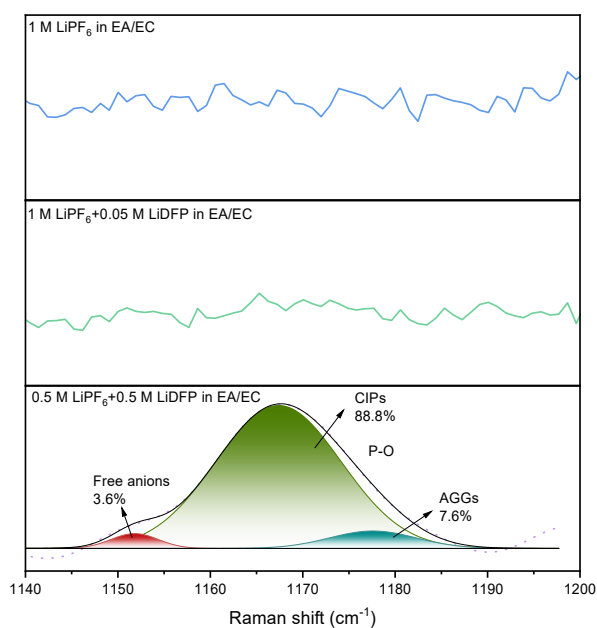

**Figure S4.** Raman shifts from 1140 to 1200  $\text{cm}^{-1}$  of 1 M  $\text{LiPF}_6$  EA/EC, 1 M  $\text{LiPF}_6 + 0.05$  M  $\text{LiDFP}$  EA/EC, and 0.5 M  $\text{LiPF}_6 + 0.5$  M  $\text{LiDFP}$  EA/EC electrolytes.

To experimentally validate the anion coordination predicted by MD simulations, we performed Raman spectroscopy and deconvolution analysis on electrolytes with varying  $\text{LiDFP}$  content (EA/EC co-solvent, 1 M  $\text{LiPF}_6$  in EA/EC electrolyte, 1 M  $\text{LiPF}_6 + 0.05$  M  $\text{LiDFP}$  in EA/EC electrolyte, and 0.5 M  $\text{LiPF}_6 + 0.5$  M  $\text{LiDFP}$  in EA/EC electrolyte). In the P–O stretching region (1150–1180  $\text{cm}^{-1}$ ), a characteristic peak emerges and intensifies with increasing  $\text{LiDFP}$  concentration, indicating enhanced  $\text{PO}_2\text{F}_2^-$  coordination. Following the referenced method, we quantitatively distinguished free anions, contact ion pairs (CIPs), and aggregates (AGGs). As shown in Figure S4, free anions constitute only 3.6%, while CIPs and AGGs dominate at 88.8% and 7.6%, respectively. This distribution confirms that  $\text{LiDFP}$  exists predominantly as CIPs and AGGs, markedly increasing the  $\text{PO}_2\text{F}_2^-$  coordination number in the primary  $\text{Li}^+$  solvation shell, in excellent agreement with the MD simulations in Figure S3.

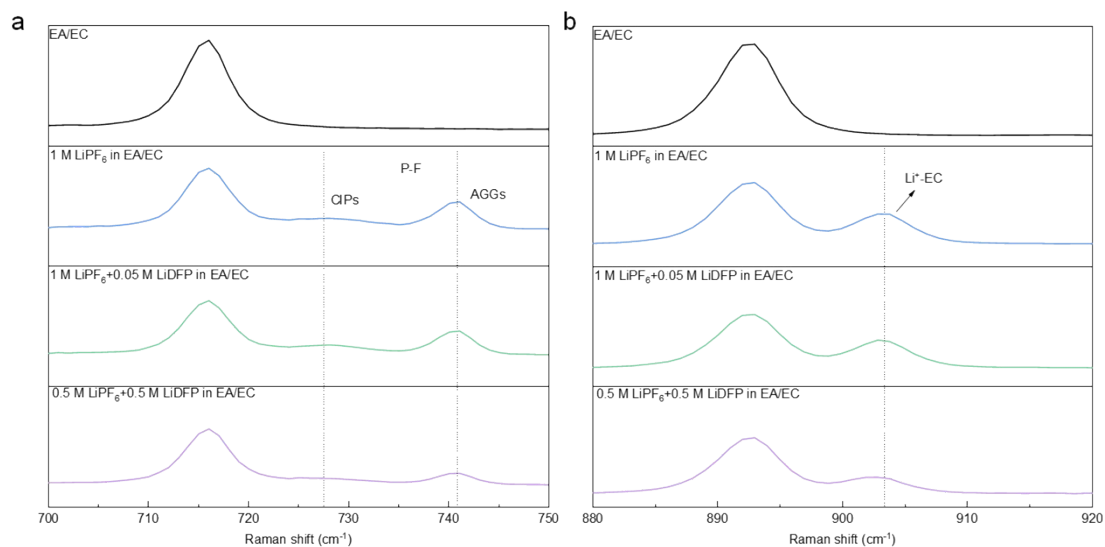

**Figure S5.** Raman shifts from (a) 700 to 750  $\text{cm}^{-1}$  and 880 to 920  $\text{cm}^{-1}$  of EA/EC, 1 M  $\text{LiPF}_6$  EA/EC, 1 M  $\text{LiPF}_6$  + 0.05 M  $\text{LiDFP}$  EA/EC, and 0.5 M  $\text{LiPF}_6$  + 0.5 M  $\text{LiDFP}$  EA/EC electrolytes.

We further examined the P–F characteristic peak of  $\text{LiPF}_6$  and the  $\text{Li}^+$ –EC coordination peak (Figure S5). Both peaks weaken significantly with higher  $\text{LiDFP}$  content, indicating reduced coordination of  $\text{Li}^+$  with  $\text{LiPF}_6^-$  and EC. These spectral trends are fully consistent with the MD results presented in Figure 2 of the manuscript, directly linking solvation structure to interfacial chemistry.

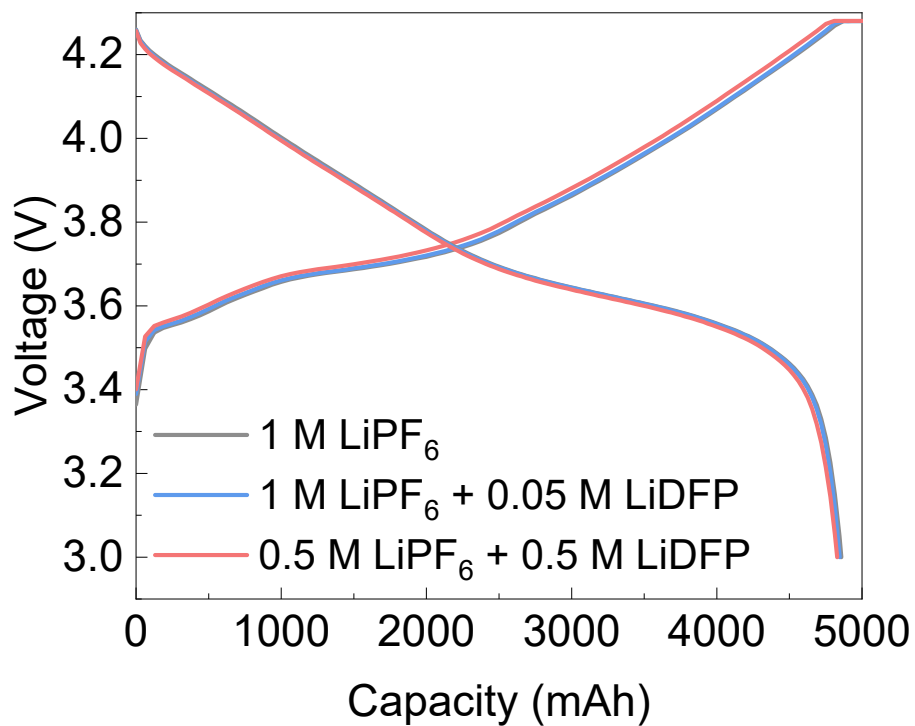

**Figure S6.** Charge–discharge curves of the NCM613||Gr pouch cells using various ratios of LiPF<sub>6</sub> and LiDFP mixed salts.

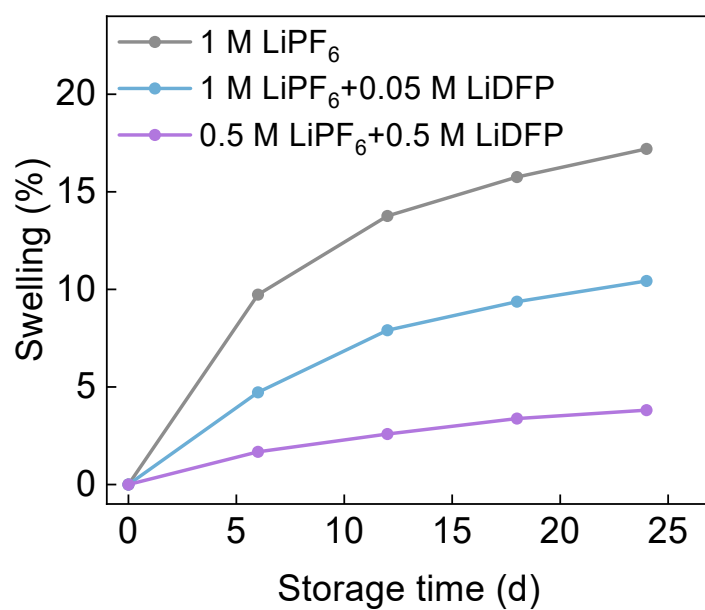

**Figure S7.** Swelling of the NCM613||Gr pouch cells stored at 60°C for 24 days using various ratios of LiPF<sub>6</sub> and LiDFP mixed salts.

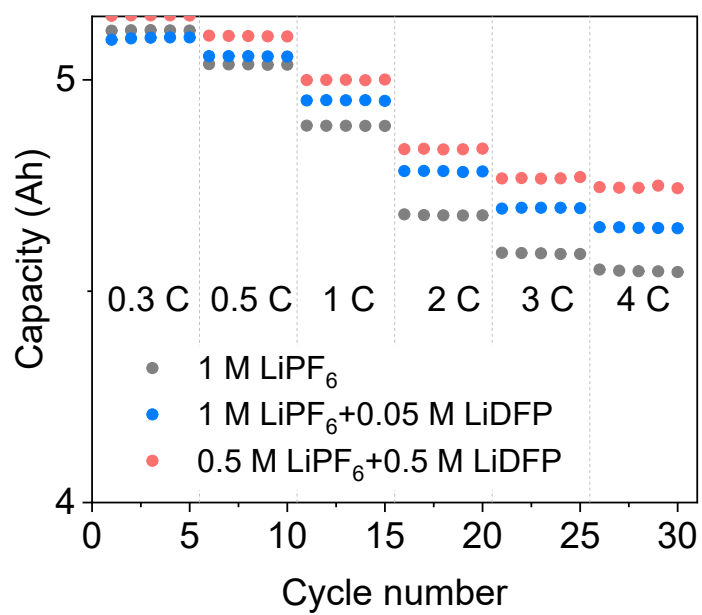

**Figure S8.** Rate performance of the pouch cells using various ratios of LiPF<sub>6</sub> and LiDFP mixed salts.

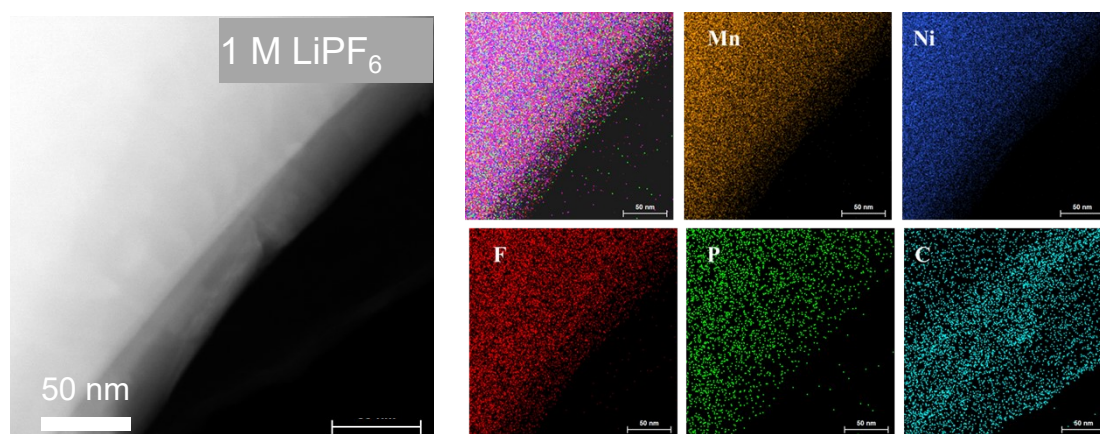

**Figure S9.** HRTEM HADDF images and elemental maps of the cathodes after the initial formation in 1 M LiPF<sub>6</sub> EA/EC electrolyte.

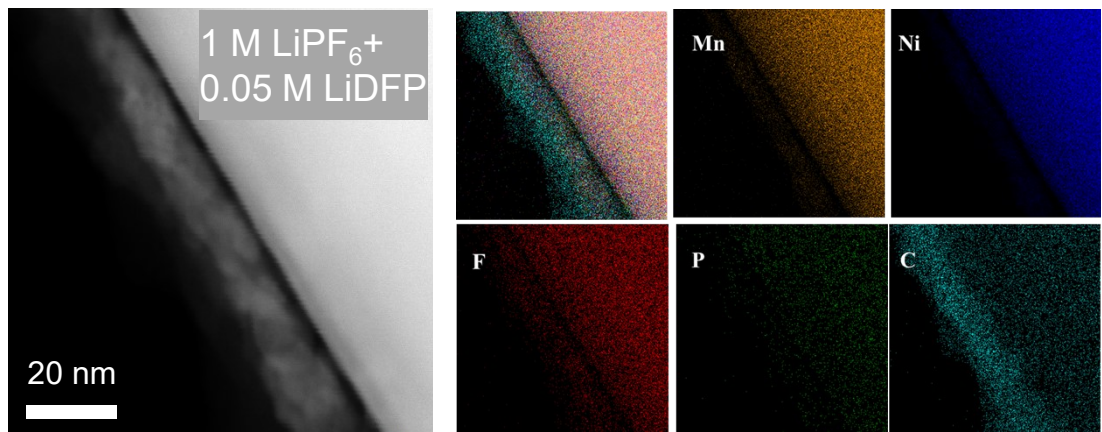

**Figure S10.** HRTEM HADDF images and elemental maps of the cathodes after the initial formation in 1 M LiPF<sub>6</sub> + 0.05 M LiDFP EA/EC electrolyte.

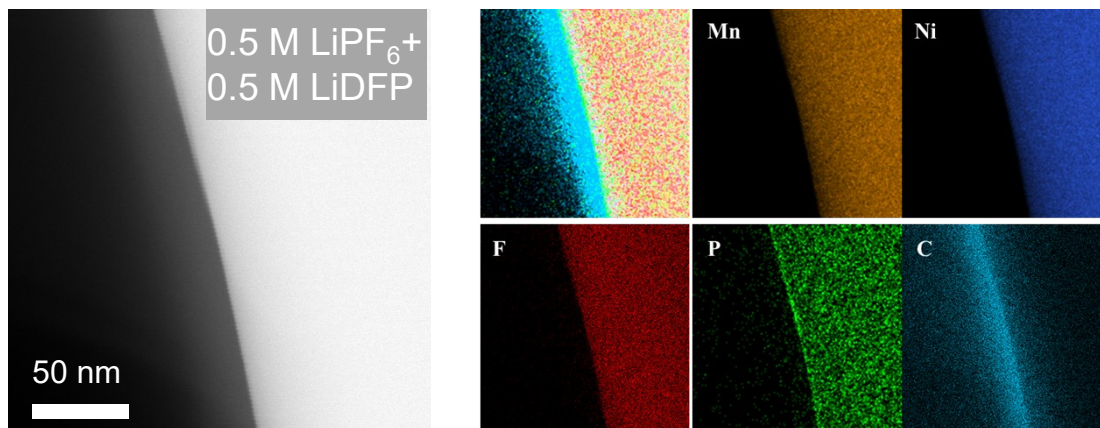

**Figure S11.** HRTEM HADDF images and elemental maps of the cathodes after the initial formation in 0.5 M LiPF<sub>6</sub> + 0.5 M LiDFP EA/EC electrolyte.

**Table S1.** Several solvents' dielectric constants, DN, viscosity, and solubility of LiDFP

| Solvent | Dielectric constant | DN   | Viscosity / mPa·s | LiDFP solubility (25°C)/g |
|---------|---------------------|------|-------------------|---------------------------|
| EA      | 6.0                 | 17.1 | 0.45 (20°C)       | >9                        |
| DMSO    | 46.4                | 29.8 | 1.99 (25°C)       | >30                       |
| TEP     | 13.1                | 23.4 | 1.60 (25°C)       | >20                       |
| DME     | 7.2                 | 20.0 | 1.10 (20°C)       | >29                       |
| SL      | 42.0                | 14.8 | 10.29 (30°C)      | >25                       |

**Table S2.** The conductivity of different LiDFP electrolytes.

| Electrolyte formula                              | conductivity@25°C (mS/cm) |
|--------------------------------------------------|---------------------------|
| EA, 1.1 M LiDFP (Nearly saturated)               | 0.04                      |
| EA/EC=7/3, 1.5 M LiDFP (Nearly saturated)        | 0.62                      |
| EA/EC=7/3, 1 M LiPF <sub>6</sub>                 | 14.29                     |
| EA/EC=7/3, 1 M LiPF <sub>6</sub> + 0.05 M LiDFP  | 13.87                     |
| EA/EC=7/3, 1 M LiPF <sub>6</sub> + 0.5 M LiDFP   | 11.14                     |
| EA/EC=7/3, 0.5 M LiPF <sub>6</sub> + 0.5 M LiDFP | 8.44                      |

**Table S3.** Comparison of Li<sup>+</sup> coordination number in the first solvation sheath among three electrolytes.

| Electrolyte                           | P <sub>PF<sub>6</sub><sup>-</sup></sub> | P <sub>PO<sub>2</sub>F<sub>2</sub><sup>-</sup></sub> | O <sub>EC</sub> | O <sub>EA</sub> | PO <sub>2</sub> F <sub>2</sub> <sup>-</sup> /PF <sub>6</sub> <sup>-</sup> | PO <sub>2</sub> F <sub>2</sub> <sup>-</sup> /Solvent |
|---------------------------------------|-----------------------------------------|------------------------------------------------------|-----------------|-----------------|---------------------------------------------------------------------------|------------------------------------------------------|
| 1 M LiPF <sub>6</sub>                 | 0.406                                   | -                                                    | 1.216           | 3.135           | -                                                                         | -                                                    |
| 1 M LiPF <sub>6</sub> + 0.05 M LiDFP  | 0.399                                   | 0.077                                                | 1.190           | 3.047           | 0.193                                                                     | 0.018                                                |
| 0.5 M LiPF <sub>6</sub> + 0.5 M LiDFP | 0.153                                   | 0.696                                                | 0.940           | 2.633           | 4.549                                                                     | 0.195                                                |

**Table S4.** Experimental context of the reported Gr-based full cell in Figure3f.

|          | Cathode             | Anode | Voltage range | Cell format |
|----------|---------------------|-------|---------------|-------------|
| Ref.45   | NCM523              | Gr    | 3.0-4.3V      | Pouch cell  |
| Ref.46   | NCM811              | Gr    | 2.8-4.3V      | Pouch cell  |
| Ref.47   | LiFePO <sub>4</sub> | Gr    | 2.5-4.2V      | Coin cell   |
| Ref.48   | LiCoO <sub>2</sub>  | Gr    | 2.8-4.55V     | Pouch cell  |
| Our work | NCM613              | Gr    | 2.8-4.28V     | Pouch cell  |
